# Supplementary material for: Enantioselective Friedel–Crafts reactions in water catalyzed by a human telomeric G-quadruplex DNA metalloenzyme
Source: Royal Society of Chemistry journal article supplement (doi:10.1039/c2cc31320k), 2012-01-01
Supplement: c2cc31320k.pdf [file c2cc31320k.pdf]

**Electronic supplementary information (ESI)**

**Enantioselective Friedel-Crafts reactions in water catalyzed by  
human telomeric G-quadruplex metalloenzyme**

Changhao Wang,<sup>ab</sup> Yinghao Li,<sup>ab</sup> Guoqing Jia,<sup>a</sup> Yan Liu,<sup>a</sup> Shengmei Lu<sup>a</sup> and Can Li<sup>\*a</sup>

<sup>a</sup> *State Key Laboratory of Catalysis, Dalian Institute of Chemical Physics,*

*Chinese Academy of Sciences, Dalian 116023, China*

<sup>b</sup> *Graduate School of Chinese Academy of Sciences, Beijing 100049, China*

*\*To whom correspondence should be addressed. E-mail: canli@dicp.ac.cn*

*Tel: (+86) 411-84379070; Fax: (+86) 411-84694447.*

## Table of Contents

|                                                       |            |
|-------------------------------------------------------|------------|
| <b>General remarks.....</b>                           | <b>S3</b>  |
| <b>Materials.....</b>                                 | <b>S4</b>  |
| <b>Typical procedure.....</b>                         | <b>S5</b>  |
| <b>Calculation the conversion of 1a.....</b>          | <b>S6</b>  |
| <b>Scheme S1.....</b>                                 | <b>S6</b>  |
| <b>Figure S1.....</b>                                 | <b>S6</b>  |
| <b>Table S1.....</b>                                  | <b>S7</b>  |
| <b>Table S2.....</b>                                  | <b>S8</b>  |
| <b>Table S3.....</b>                                  | <b>S9</b>  |
| <b>References.....</b>                                | <b>S10</b> |
| <b><sup>1</sup>H-NMR spectra and HPLC traces.....</b> | <b>S11</b> |

### General remarks

Circular dichroism (CD) spectra were recorded on a dual beam DSM 1000 CD spectrophotometer (Olis, Bogart, GA) with a 10 mm quartz cell. Samples containing 10  $\mu$ M oligomer were prepared and treated as described above before collecting CD spectra. Each measurement was recorded from 230 to 320 nm at room temperature (about 20 °C). The average scan for each sample was subtracted by a background CD spectrum of corresponding buffer solution.  $^1\text{H}$ -NMR spectrum was recorded on a Bruker DRX 400 MHz type ( $^1\text{H}$ , 400 MHz) with an internal reference tetramethylsilane. Data for  $^1\text{H}$  NMR spectra were recorded as follows: chemical shift ( $\delta$ , ppm), multiplicity (s, singlet; d, doublet; t, triplet; q, quartet; m, multiplet), integration, coupling constant (Hz). High-performance liquid chromatography (HPLC) analysis was performed on an Agilent 1100 Series instrument with the eluents of hexane and isopropanol (*i*-PrOH), using a Daicel Chiralpak AD Column (250  $\times$  4.6 mm) and Daicel Chiralcel OD Column (250  $\times$  4.6 mm).

## Materials

DNA oligodeoxynucleotides: 5'-G<sub>3</sub>(TTAG<sub>3</sub>)<sub>3</sub>-3' (ODN-1), 5'-G<sub>3</sub>(TTTG<sub>3</sub>)<sub>3</sub>-3' (ODN-2), 5'-G<sub>3</sub>(ATAG<sub>3</sub>)<sub>3</sub>-3' (ODN-3), 5'-G<sub>3</sub>(TATG<sub>3</sub>)<sub>3</sub>-3' (ODN-4), 5'-G<sub>3</sub>(AAAG<sub>3</sub>)<sub>3</sub>-3' (ODN-5), 5'-G<sub>3</sub>(AATG<sub>3</sub>)<sub>3</sub>-3' (ODN-6), 5'-T<sub>3</sub>(TTAT<sub>3</sub>)<sub>3</sub>-3' (ODN-7), 5'-A<sub>3</sub>(TTAA<sub>3</sub>)<sub>3</sub>-3' (ODN-8), 5'-(TTA)<sub>7</sub>-3' (ODN-9) and 3-(N-morpholino)propanesulfonic acid (MOPS) were purchased from Sangon (Shanghai, China), and the strand concentrations were determined by measuring the absorbance at 260 nm using the extinction coefficient values published in the literature.<sup>1</sup> Cu(NO<sub>3</sub>)<sub>2</sub>·3H<sub>2</sub>O (>99%), Zn(NO<sub>3</sub>)<sub>2</sub>·6H<sub>2</sub>O (>99%), Co(NO<sub>3</sub>)<sub>2</sub>·6H<sub>2</sub>O (>99%), Ni(NO<sub>3</sub>)<sub>2</sub>·6H<sub>2</sub>O (>99%), NaCl (>99%), KCl (>99%) and PEG200 were purchased from Alfa Aesar (Tianjin, China). 5-methoxyindole (98%), indole (99%), 5-chloroindole (98%), 1-methylindole (98%) and 1-methylindole (98%) were purchased from J&K (Beijing, China). Water was distilled and deionized using a Milli-Q A10 water purification system. Other reagents and solvents were obtained from commercial sources and used without further purification.  $\alpha,\beta$ -unsaturated 2-acyl imidazoles **1a-e** were prepared according to the literature.<sup>2,3</sup>

## Typical procedure

To a MOPS buffer (1 mL, 20 mM, pH 6.5) containing NaCl (50 mM), an aqueous solution of ODN-1 (5'-G<sub>3</sub>(TTAG<sub>3</sub>)<sub>3</sub>-3'), final conc. 100 μM) was added. After stirred for a half hour at 4 °C, a solution of Cu(NO<sub>3</sub>)<sub>2</sub> (2 μL of a 25 mM solution, final conc. 50 μM) was added. Then, 2-acyl imidazole **1a** in DMSO (10 μL of a 0.1 M solution) was added. The reaction was initiated by addition of nucleophile **2a** in DMSO (10 μL of a 0.5 M solution, 5 equiv.) and the mixture was stirred for 24 hours, followed by the extraction with ethyl acetate (3 × 5 mL), and the solvent was removed under reduced pressure. After a short flash chromatography, the residue was directly analyzed by <sup>1</sup>H-NMR and HPLC.<sup>4,5</sup>

### Calculation the conversion of **1a**<sup>6</sup>

Conversions of **1a** were calculated using the following formula:

$$\text{Conversion of } \mathbf{1a} (\%) = \text{PA}_{3a} / (\text{PA}_{3a} + \text{PA}_{1a} / f) \quad \text{Scheme S1}$$

Where  $\text{PA}_{1a}$  and  $\text{PA}_{3a}$  are the peak areas of **1a** and **3a**, respectively. And  $f$  is the correction factor determined to be 1.27 from a fitting curve (Fig. S1).

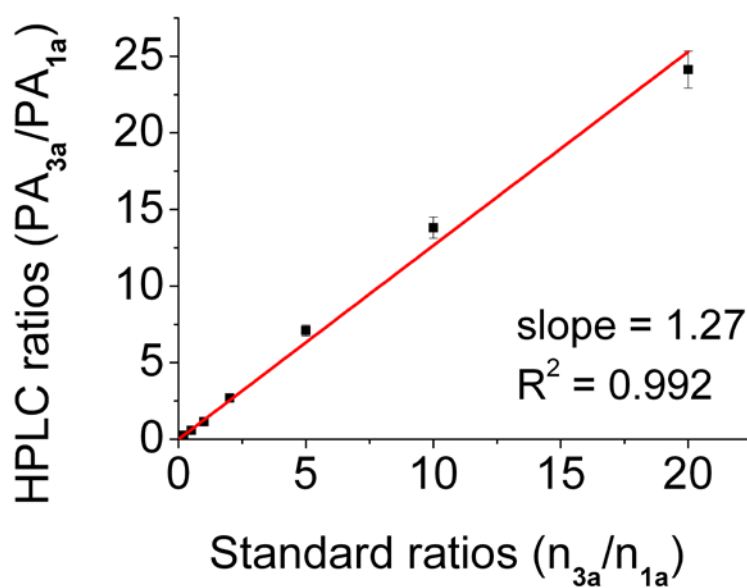

**Fig. S1** Determination of the correction factor. The HPLC ratios of peak areas ( $\text{PA}_{3a}/\text{PA}_{1a}$ ) were determined with the standard molar ratios ( $n_{3a}/n_{1a}$ ) of 1/20, 1/10, 1/5, 1/2, 1, 2, 5, 10, 20. The correction factor ( $f = 1.27$ ) was estimated from the fitting curve ( $R^2 = 0.992$ ).

**Table S1** Enantioselective Friedel-Crafts reactions catalyzed by ODN-1-Cu<sup>2+</sup> by tuning the concentration of K<sup>+</sup> ions

<sup>a</sup> Unless otherwise noted, all reactions were carried out in a typical procedure. <sup>b</sup> Determined by chiral-phase HPLC for the crude product (Scheme S1, ESI<sup>†</sup>). <sup>c</sup> Determined by chiral-phase HPLC.

**Table S2** Enantioselective Friedel-Crafts reactions catalyzed by ODN-1-Cu<sup>2+</sup> by varying the amount of PEG200

<sup>a</sup> Unless otherwise noted, all reactions were carried out in a typical procedure. <sup>b</sup> Determined by chiral-phase HPLC for the crude product (Scheme S1, ESI†). <sup>c</sup> Determined by chiral-phase HPLC.



**Table S3** Enantioselective Friedel-Crafts reactions catalyzed by various 21mer  
oligodeoxynucleotides combining with Cu<sup>2+</sup> ions

<sup>a</sup> Unless otherwise noted, all reactions were carried out in a typical procedure. <sup>b</sup> Determined by  
chiral-phase HPLC for the crude product (Scheme S1, ESI†). <sup>c</sup> Determined by chiral-phase HPLC.

## References

- 1 N. Kumar and S. Maiti, *Nucleic Acid Res.*, 2005, **33**, 6723.
- 2 D. A. Evans, K. R. Fandrick and H. J. Song, *J. Am. Chem. Soc.*, 2005, **127**, 8942.
- 3 M. C. Myers, A. R. Bharadwaj, B. C. Milgram and K. A. Scheidt, *J. Am. Chem. Soc.*, 2005, **127**, 14675.
- 4 A. J. Boersma, B. L. Feringa and G. Roelfes, *Angew. Chem., Int. Ed.*, 2009, **48**, 3346.
- 5 E. W. Dijk, A. J. Boersma, B. L. Feringa and G. Roelfes, *Org. Biomol. Chem.*, 2010, **8**, 3868.
- 6 N. S. Ultra and G. Roelfes, *Chem. Commun.*, 2008, 6039.



HPLC condition: Daicel chiralpak-AD, hexane/*i*-PrOH 80:20, 1.0 mL/min, 254 nm.

Racemic **3a**.

Retention times: 15.8 (+) and 21.9 (-) mins.

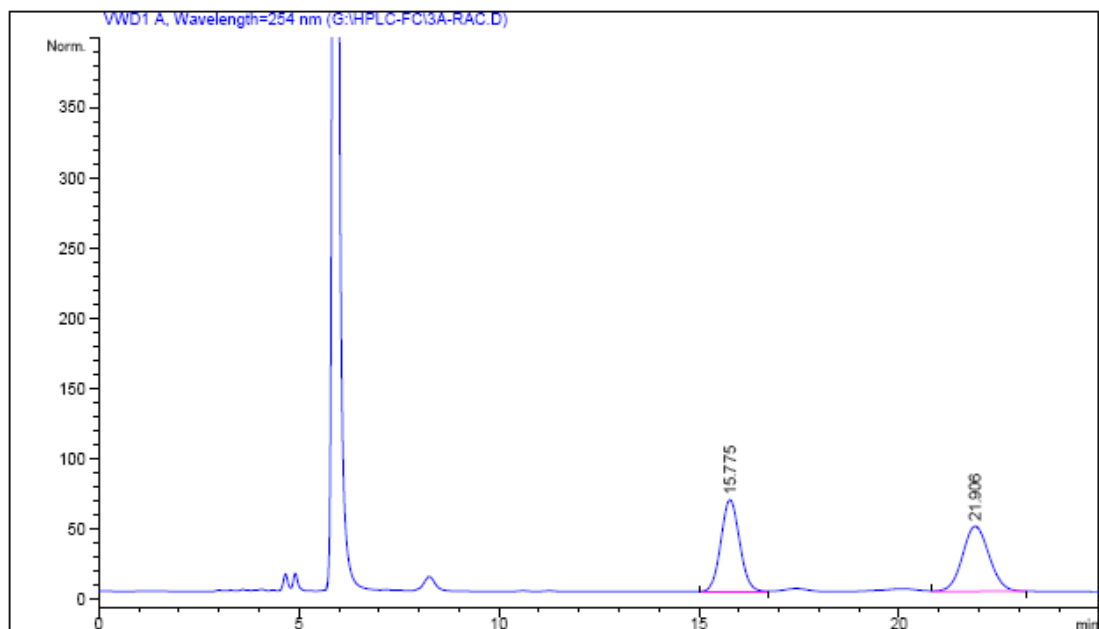

```
=====  
                          Area Percent Report  
=====
```

Sorted By : Signal  
Multiplier : 1.0000  
Dilution : 1.0000  
Use Multiplier & Dilution Factor with ISTDs

Signal 1: VWD1 A, Wavelength=254 nm

| Peak # | RetTime [min] | Type | Width [min] | Area mAU *s | Height [mAU] | Area %  |
|--------|---------------|------|-------------|-------------|--------------|---------|
| 1      | 15.775        | BB   | 0.5048      | 2129.43652  | 65.44416     | 49.7794 |
| 2      | 21.906        | VB   | 0.7208      | 2148.31177  | 46.39069     | 50.2206 |

Totals : 4277.74829 111.83483

```
=====  
*** End of Report ***
```

Product **3a** from the F-C reaction catalyzed by ODN-1-Cu<sup>2+</sup> containing 50 mM NaCl (75% ee).

Retention times: 16.1 (+) and 22.2 (-) mins.

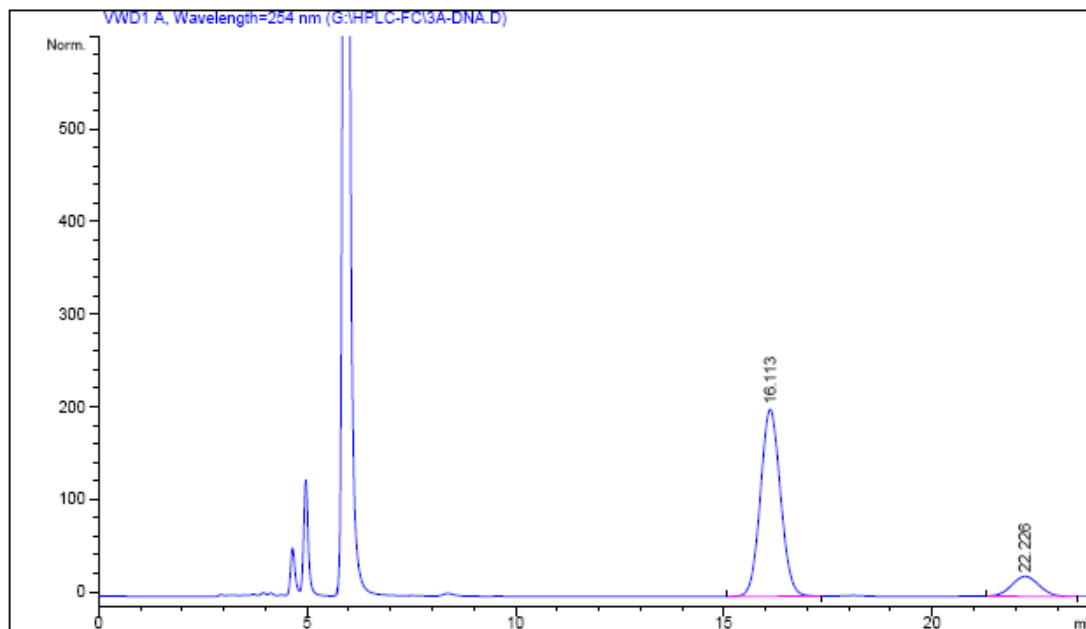

```
=====  
                          Area Percent Report  
=====
```

Sorted By : Signal  
Multiplier : 1.0000  
Dilution : 1.0000  
Use Multiplier & Dilution Factor with ISTDs

Signal 1: VWD1 A, Wavelength=254 nm

| Peak # | RetTime [min] | Type | Width [min] | Area mAU *s | Height [mAU] | Area %  |
|--------|---------------|------|-------------|-------------|--------------|---------|
| 1      | 16.113        | BB   | 0.5219      | 6768.43994  | 202.01192    | 87.2538 |
| 2      | 22.226        | BB   | 0.7231      | 988.74414   | 21.49168     | 12.7462 |

Totals : 7757.18408 223.50360

```
=====  
*** End of Report ***
```



HPLC condition: Daicel chiralpak-AD, hexane/*i*-PrOH 85:15, 1.0 mL/min, 254 nm.

Racemic **3b**.

Retention times: 19.9 (+) and 28.7 (-) mins.

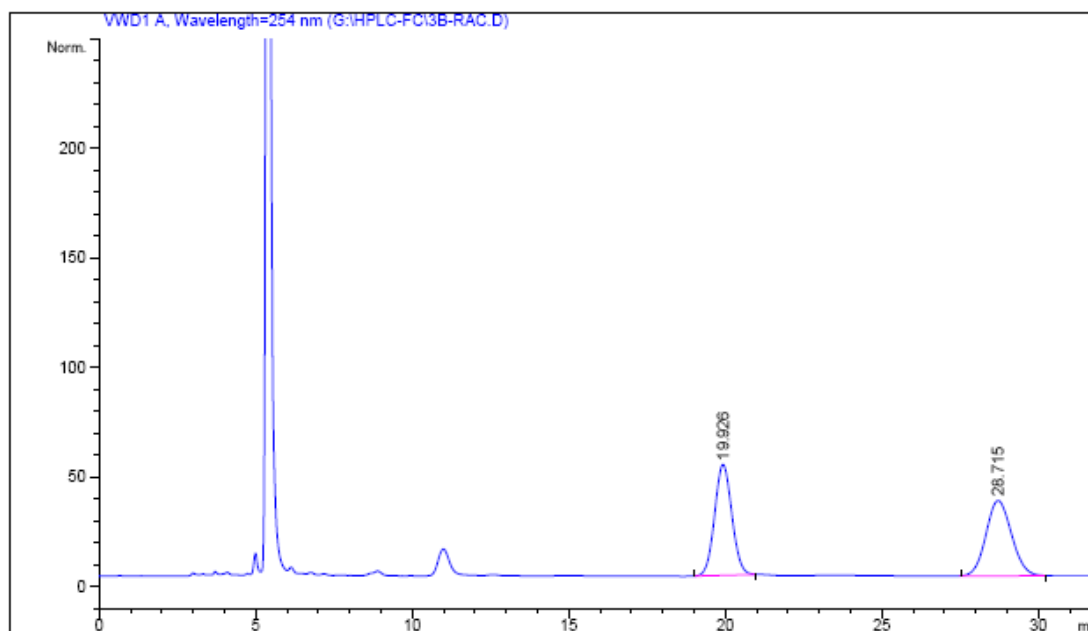

```
=====  
                          Area Percent Report  
=====
```

Sorted By : Signal  
Multiplier : 1.0000  
Dilution : 1.0000  
Use Multiplier & Dilution Factor with ISTDs

Signal 1: VWD1 A, Wavelength=254 nm

| Peak # | RetTime [min] | Type | Width [min] | Area mAU *s | Height [mAU] | Area %  |
|--------|---------------|------|-------------|-------------|--------------|---------|
| 1      | 19.926        | BB   | 0.5985      | 1941.53918  | 50.66333     | 49.7853 |
| 2      | 28.715        | BB   | 0.8849      | 1958.28259  | 34.42645     | 50.2147 |

Totals : 3899.82178 85.08978

```
=====  
*** End of Report ***
```

Product **3b** from the F-C reaction catalyzed by ODN-1-Cu<sup>2+</sup> containing 50 mM NaCl (67% ee).

Retention times: 19.9 (+) and 28.7 (-) mins.

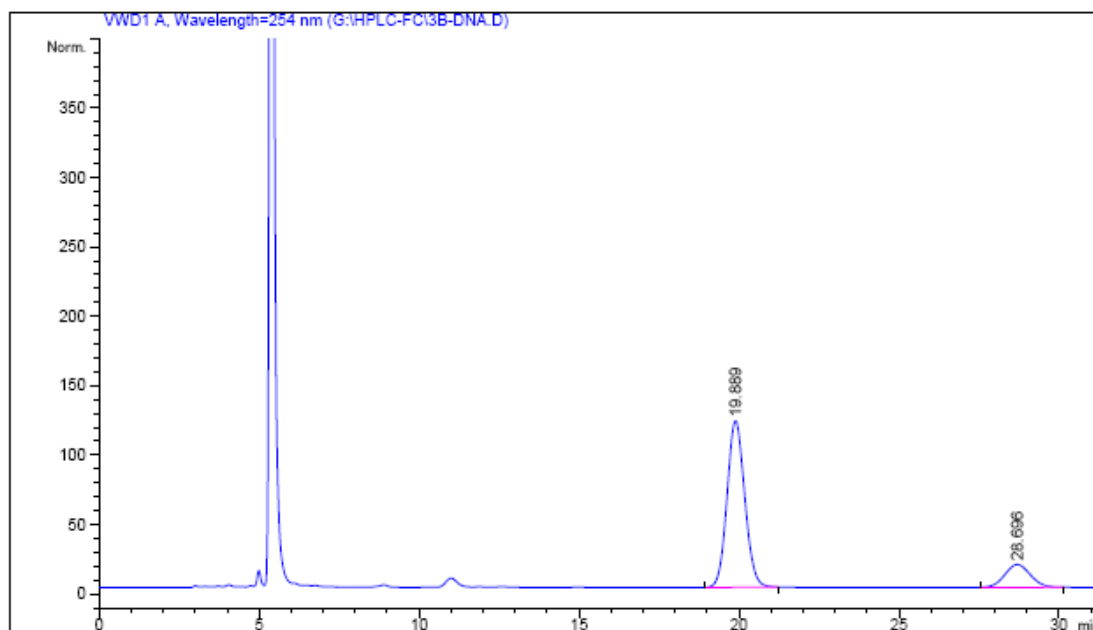

```
=====  
Area Percent Report  
=====
```

Sorted By : Signal  
Multiplier : 1.0000  
Dilution : 1.0000  
Use Multiplier & Dilution Factor with ISTDs

Signal 1: VWD1 A, Wavelength=254 nm

| Peak # | RetTime [min] | Type | Width [min] | Area mAU*s | Height [mAU] | Area %  |
|--------|---------------|------|-------------|------------|--------------|---------|
| 1      | 19.889        | BB   | 0.5965      | 4619.33008 | 119.90216    | 83.4122 |
| 2      | 28.696        | BB   | 0.8477      | 918.62451  | 16.49621     | 16.5878 |

Totals : 5537.95459 136.39836

```
=====  
*** End of Report ***
```



**3-(5-chloro-1H-indol-3-yl)-1-(1-methyl-1H-imidazol-2-yl)butan-1-one (3c).**

$^1\text{H-NMR}$  ( $\text{CDCl}_3$ , 400 MHz)  $\delta$  1.40 (d,  $J = 6.9$  Hz, 3H), 3.46 (dd,  $J = 10.8, 7.3$  Hz, 2H), 3.83–3.71 (m, 1H), 3.93 (s, 3H), 7.02 (s, 1H), 7.05 (d,  $J = 2.3$  Hz, 1H), 7.10 (dd,  $J = 8.6, 2.0$  Hz, 1H), 7.16 (s, 1H), 7.22 (d,  $J = 8.6$  Hz, 1H), 7.56 (d,  $J = 1.8$  Hz, 1H), 8.31–8.22 (m, 1H).

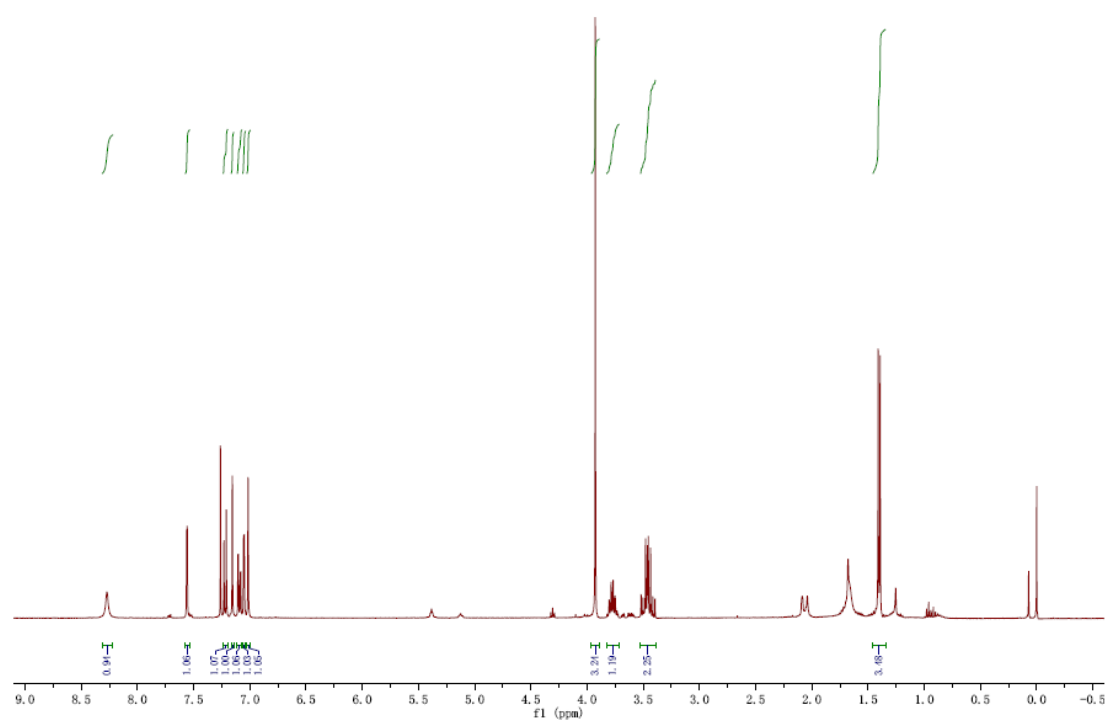

HPLC condition: Daicel chiralpak-AD, hexane/*i*-PrOH 90:10, 1.0 mL/min, 254 nm.

Racemic **3c**.

Retention times: 25.3 (+) and 32.7 (-) mins.

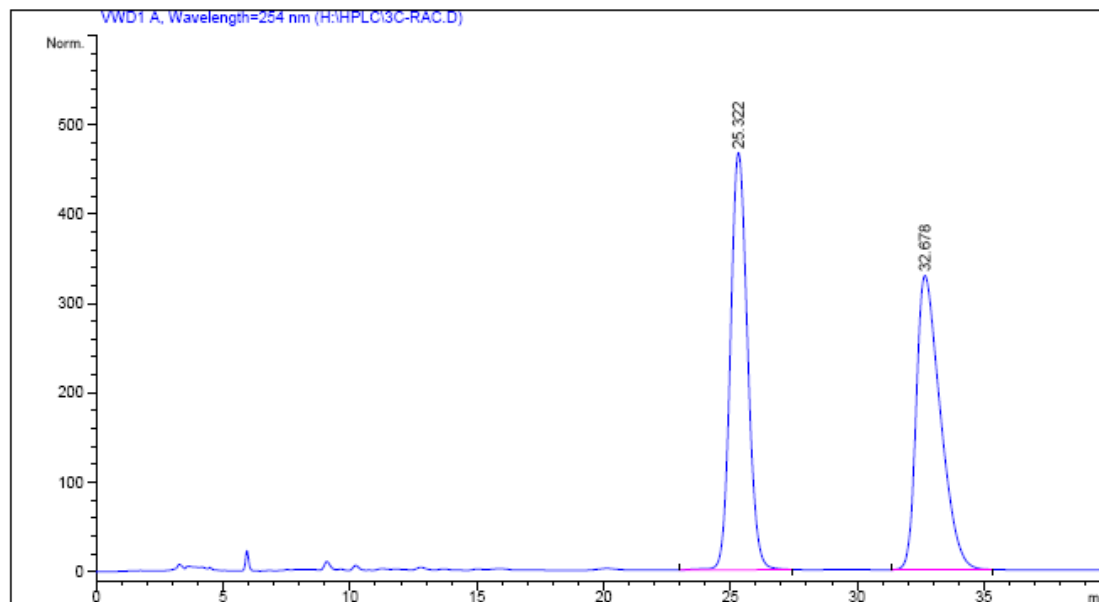

```
=====  
                          Area Percent Report  
=====
```

Sorted By : Signal  
Multiplier: : 1.0000  
Dilution: : 1.0000  
Use Multiplier & Dilution Factor with ISTDs

Signal 1: VWD1 A, Wavelength=254 nm

| Peak # | RetTime [min] | Type | Width [min] | Area [mAU*s] | Height [mAU] | Area %  |
|--------|---------------|------|-------------|--------------|--------------|---------|
| 1      | 25.322        | BB   | 0.7256      | 2.17862e4    | 466.49615    | 50.0841 |
| 2      | 32.678        | BB   | 0.9897      | 2.17131e4    | 329.14279    | 49.9159 |

Totals : 4.34993e4 795.63895

```
=====  
*** End of Report ***
```

Product **3c** from the F-C reaction catalyzed by ODN-1-Cu<sup>2+</sup> containing 50 mM NaCl (66% ee).

Retention times: 25.2 (+) and 33.1 (-) mins.

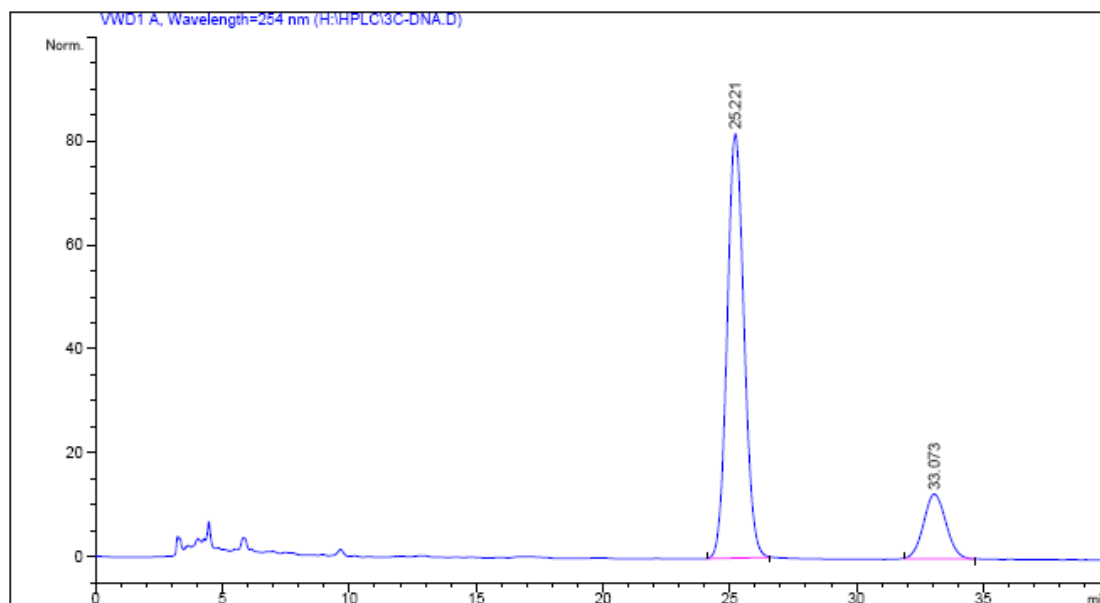

```
=====  
Area Percent Report  
=====
```

Sorted By : Signal  
Multiplier: : 1.0000  
Dilution: : 1.0000  
Use Multiplier & Dilution Factor with ISTDs

Signal 1: VWD1 A, Wavelength=254 nm

| Peak # | RetTime [min] | Type | Width [min] | Area [mAU*s] | Height [mAU] | Area %  |
|--------|---------------|------|-------------|--------------|--------------|---------|
| 1      | 25.221        | BB   | 0.7195      | 3786.17114   | 81.76723     | 83.2115 |
| 2      | 33.073        | BB   | 0.9421      | 763.88385    | 12.44414     | 16.7885 |

Totals : 4550.05499 94.21137

```
=====  
*** End of Report ***
```



HPLC condition: Daicel chiralpak-AD, hexane/*i*-PrOH 95:5, 1.0 mL/min, 254 nm.

Racemic **3d**.

Retention times: 16.1 (-) and 26.2 (+) mins.

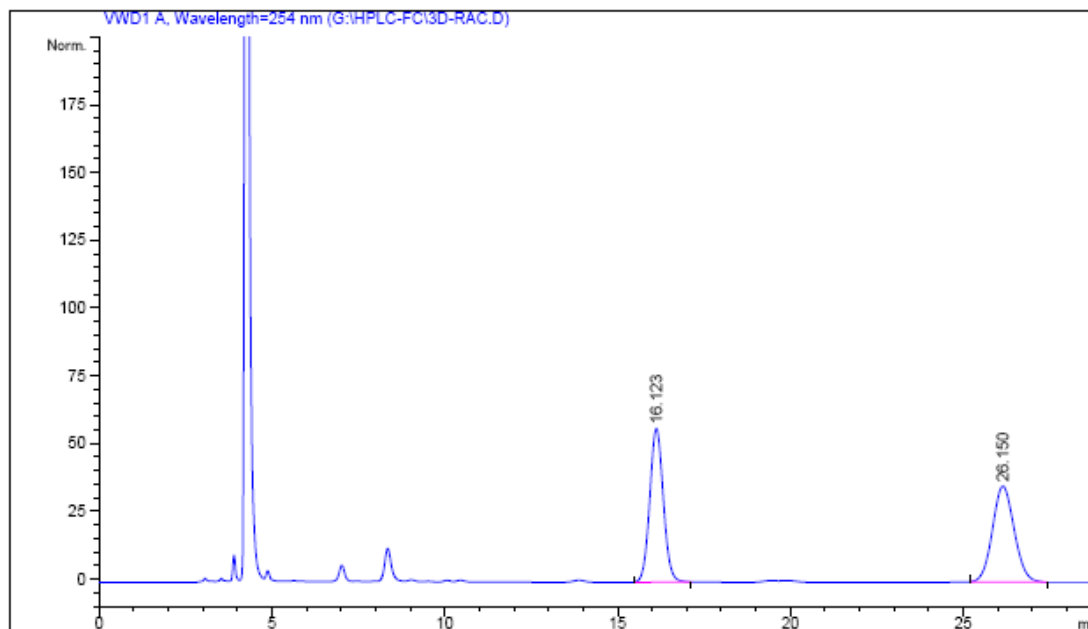

```
=====  
                          Area Percent Report  
=====
```

Sorted By : Signal  
Multiplier : 1.0000  
Dilution : 1.0000  
Use Multiplier & Dilution Factor with ISTDs

Signal 1: VWD1 A, Wavelength=254 nm

| Peak # | RetTime [min] | Type | Width [min] | Area mAU *s | Height [mAU] | Area %  |
|--------|---------------|------|-------------|-------------|--------------|---------|
| 1      | 16.123        | BB   | 0.4243      | 1583.19214  | 56.72754     | 50.1069 |
| 2      | 26.150        | BB   | 0.6796      | 1546.56458  | 35.33033     | 49.8931 |

Totals : 3099.75671 92.05787

```
=====  
*** End of Report ***
```

Product **3d** from the F-C reaction catalyzed by ODN-1-Cu<sup>2+</sup> containing 50 mM NaCl (-8% ee).

Retention times: 16.1 (-) and 26.3 (+) mins.

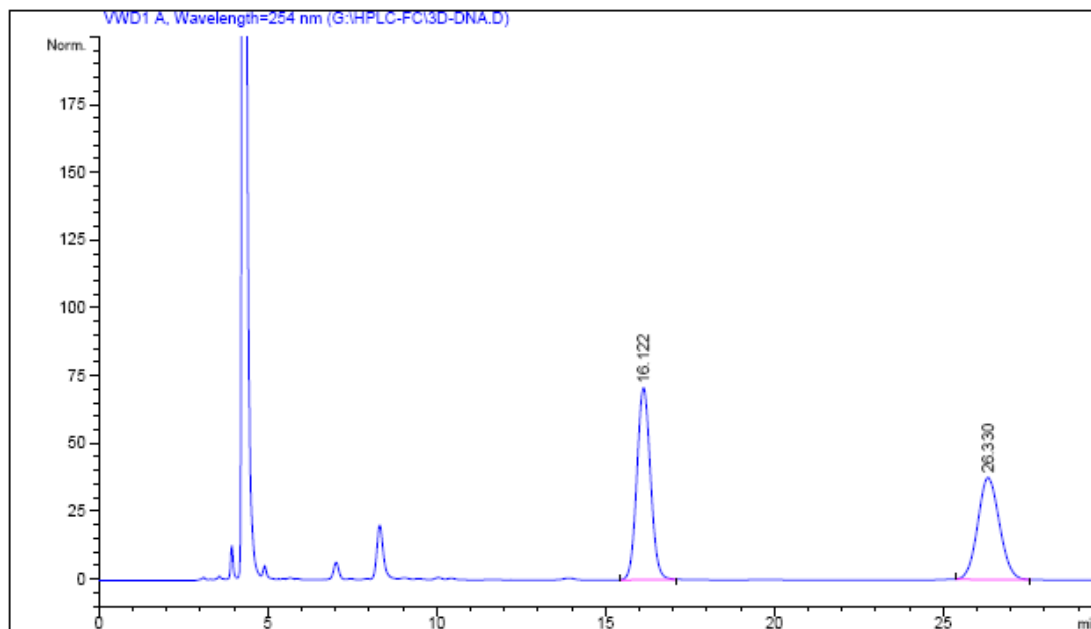

```
=====  
Area Percent Report  
=====
```

Sorted By : Signal  
Multiplier : 1.0000  
Dilution : 1.0000  
Use Multiplier & Dilution Factor with ISTDs

Signal 1: VWD1 A, Wavelength=254 nm

| Peak # | RetTime [min] | Type | Width [min] | Area mAU   | Area *s | Height [mAU] | Area %  |
|--------|---------------|------|-------------|------------|---------|--------------|---------|
| 1      | 16.122        | BB   | 0.4374      | 1985.38806 |         | 70.88864     | 54.0762 |
| 2      | 26.330        | BB   | 0.6948      | 1686.07874 |         | 37.61511     | 45.9238 |

Totals : 3671.46680 108.50375

```
=====  
*** End of Report ***
```

**1-(1-methyl-1H-imidazol-2-yl)-3-(2-methyl-1H-indol-3-yl)butan-1-one (3e).**

$^1\text{H-NMR}$  ( $\text{CDCl}_3$ , 400 MHz)  $\delta$  1.46 (d,  $J = 7.1$  Hz, 3H), 2.41 (s, 3H), 3.61 (dd,  $J = 7.3, 1.7$  Hz, 2H), 3.78 (dd,  $J = 14.7, 7.1$  Hz, 1H), 3.85 (s, 3H), 6.93 (s, 1H), 7.08–7.00 (m, 2H), 7.09 (d,  $J = 0.8$  Hz, 1H), 7.21 (dt,  $J = 8.1, 3.3$  Hz, 1H), 7.65 (dd,  $J = 8.1, 6.7$  Hz, 1H), 7.78–7.69 (m, 1H).

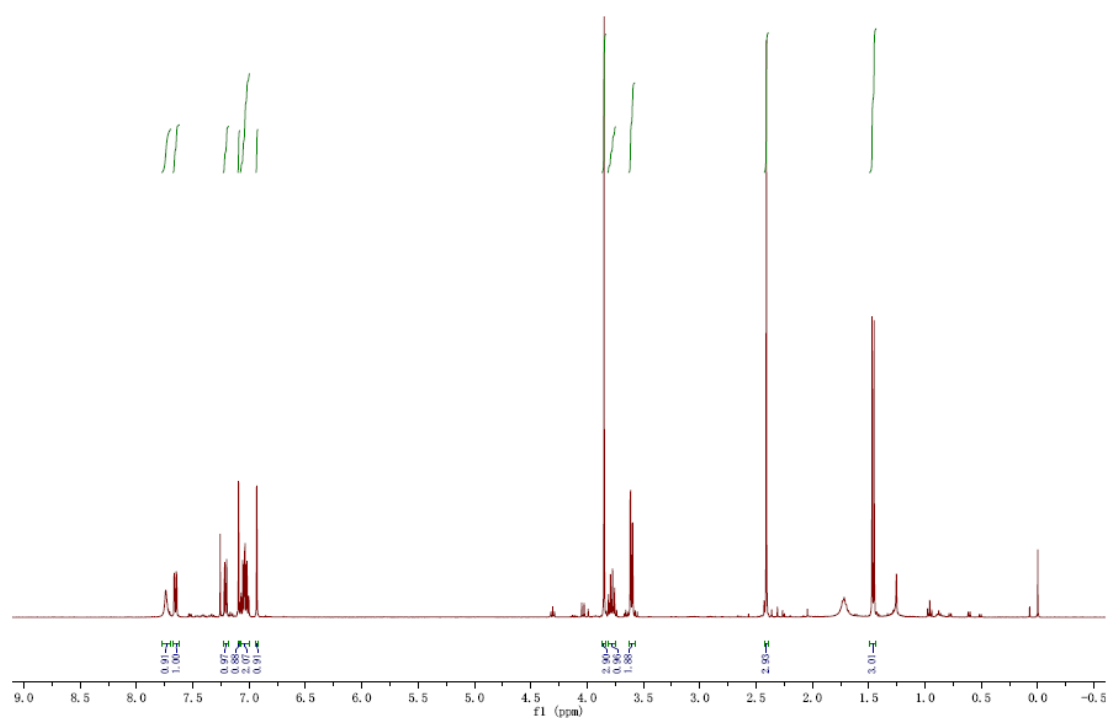

HPLC condition: Daicel chiralpak-AD, hexane/*i*-PrOH 85:15, 1.0 mL/min, 254 nm.

Racemic **3e**.

Retention times: 22.3 (-) and 33.2 (+) mins.

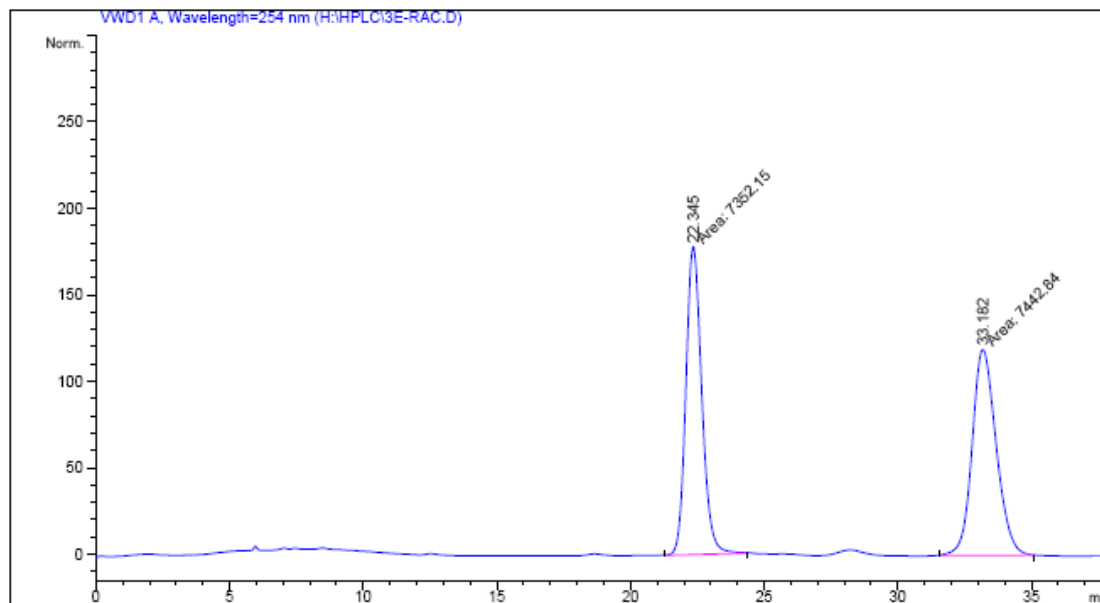

```
=====  
Area Percent Report  
=====
```

Sorted By : Signal  
Multiplier: : 1.0000  
Dilution: : 1.0000  
Use Multiplier & Dilution Factor with ISTDs

Signal 1: VWD1 A, Wavelength=254 nm

| Peak # | RetTime [min] | Type | Width [min] | Area [mAU*s] | Height [mAU] | Area %  |
|--------|---------------|------|-------------|--------------|--------------|---------|
| 1      | 22.345        | MM   | 0.6889      | 7352.15186   | 177.85948    | 49.6935 |
| 2      | 33.182        | MM   | 1.0436      | 7442.83643   | 118.86923    | 50.3065 |

Totals : 1.47950e4 296.72871

```
=====  
*** End of Report ***  
=====
```



Product **3e** from the F-C reaction catalyzed by ODN-1-Cu<sup>2+</sup> containing 50 mM NaCl (-44% ee).

Retention times: 21.9 (-) and 32.8 (+) mins.

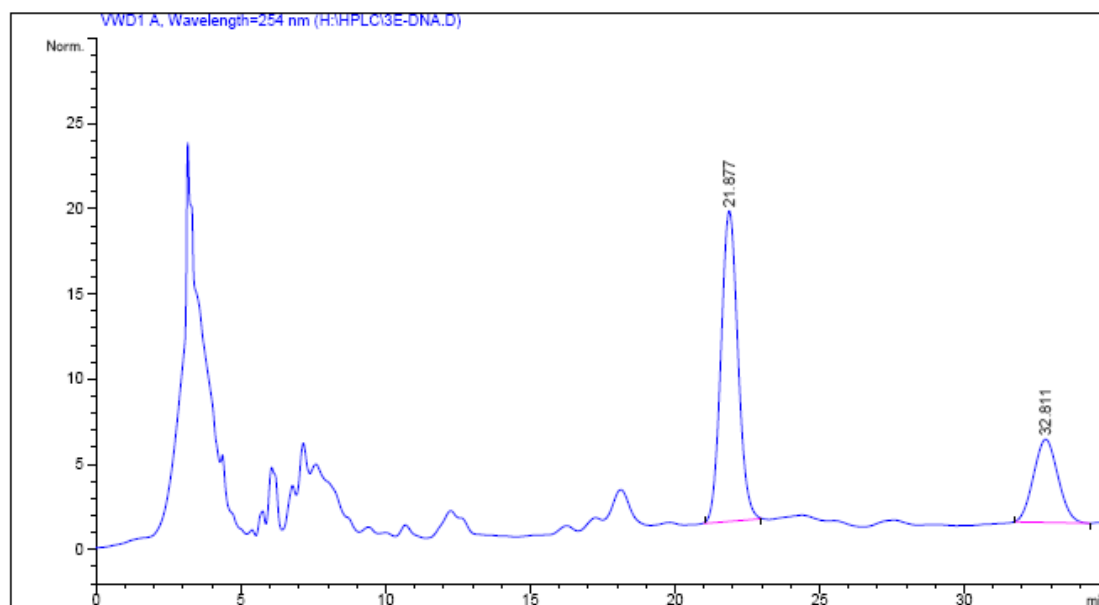

```
=====  
Area Percent Report  
=====
```

Sorted By : Signal  
Multiplier: : 1.0000  
Dilution: : 1.0000  
Use Multiplier & Dilution Factor with ISTDs

Signal 1: VWD1 A, Wavelength=254 nm

| Peak # | RetTime [min] | Type | Width [min] | Area [mAU*s] | Height [mAU] | Area %  |
|--------|---------------|------|-------------|--------------|--------------|---------|
| 1      | 21.877        | BB   | 0.6299      | 742.38391    | 18.22075     | 72.1411 |
| 2      | 32.811        | BB   | 0.8585      | 286.68857    | 4.88252      | 27.8589 |

Totals : 1029.07248 23.10326

```
=====  
*** End of Report ***
```

**3-(5-methoxy-1*H*-indol-3-yl)-1-(1-methyl-1*H*-imidazol-2-yl)-3-phenyl-1-propanon**

**e (3f).**

<sup>1</sup>H-NMR (CDCl<sub>3</sub>, 400 MHz) δ 3.70 (s, 3H), 3.83 (dd, *J* = 16.4, 7.8 Hz, 1H), 3.88 (s, 3H), 3.99 (dd, *J* = 16.5, 7.5 Hz, 1H), 5.05 (t, *J* = 7.6 Hz, 1H), 6.98 (dd, *J* = 12.8, 6.2 Hz, 3H), 7.14 (dd, *J* = 11.2, 6.3 Hz, 3H), 7.22 (d, *J* = 7.4 Hz, 3H), 7.39 (d, *J* = 7.5 Hz, 2H), 7.48 (d, *J* = 7.9 Hz, 1H).

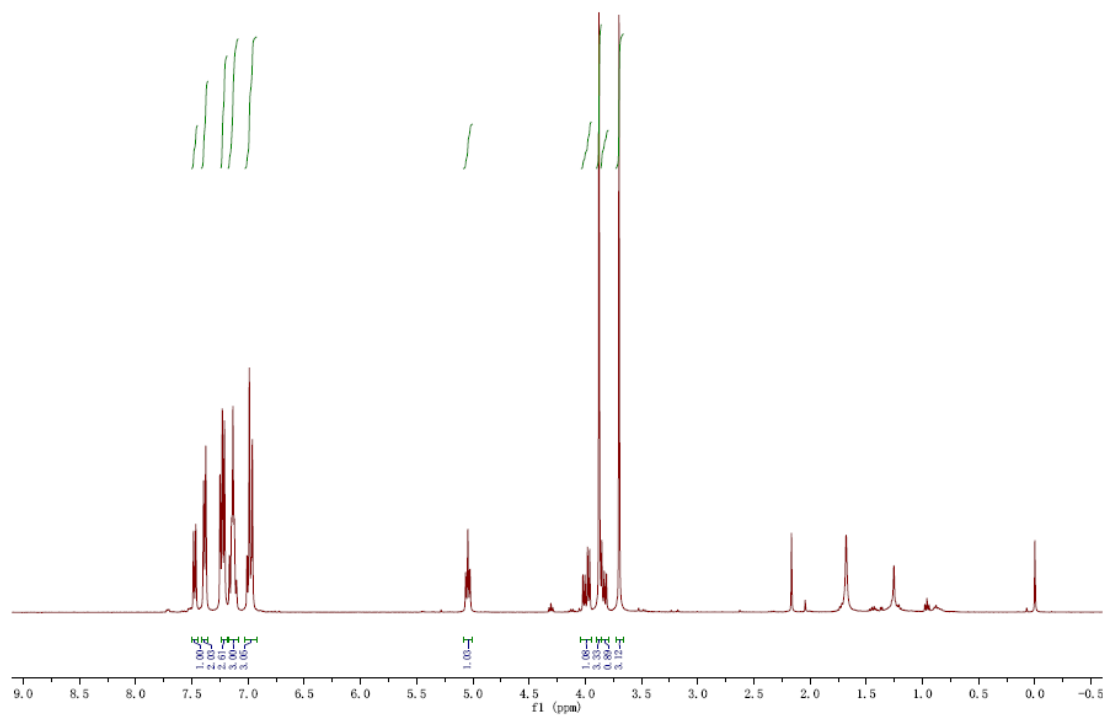

HPLC condition: Daicel chiralpak-AD, hexane/*i*-PrOH 80:20, 1.0 mL/min, 254 nm.

Racemic **3f**.

Retention times: 29.5 and 38.6 mins.

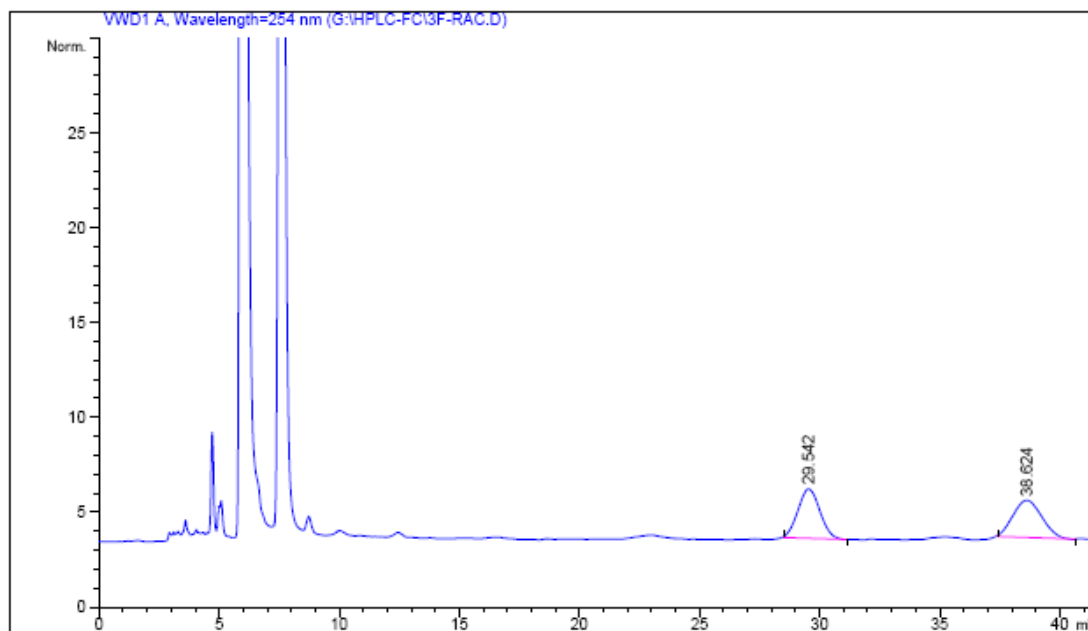

```
=====  
                          Area Percent Report  
=====
```

Sorted By : Signal  
Multiplier : 1.0000  
Dilution : 1.0000  
Use Multiplier & Dilution Factor with ISTDs

Signal 1: VWD1 A, Wavelength=254 nm

| Peak # | RetTime [min] | Type | Width [min] | Area mAU *s | Height [mAU] | Area %  |
|--------|---------------|------|-------------|-------------|--------------|---------|
| 1      | 29.542        | BB   | 0.8192      | 164.92184   | 2.60316      | 50.3833 |
| 2      | 38.624        | BB   | 0.9805      | 162.60751   | 1.95514      | 49.6467 |

Totals : 327.52936 4.55829

```
=====  
*** End of Report ***
```

Product **3f** from the F-C reaction catalyzed by ODN-1-Cu<sup>2+</sup> containing 50 mM NaCl (21% ee).

Retention times: 29.6 and 38.6 mins.

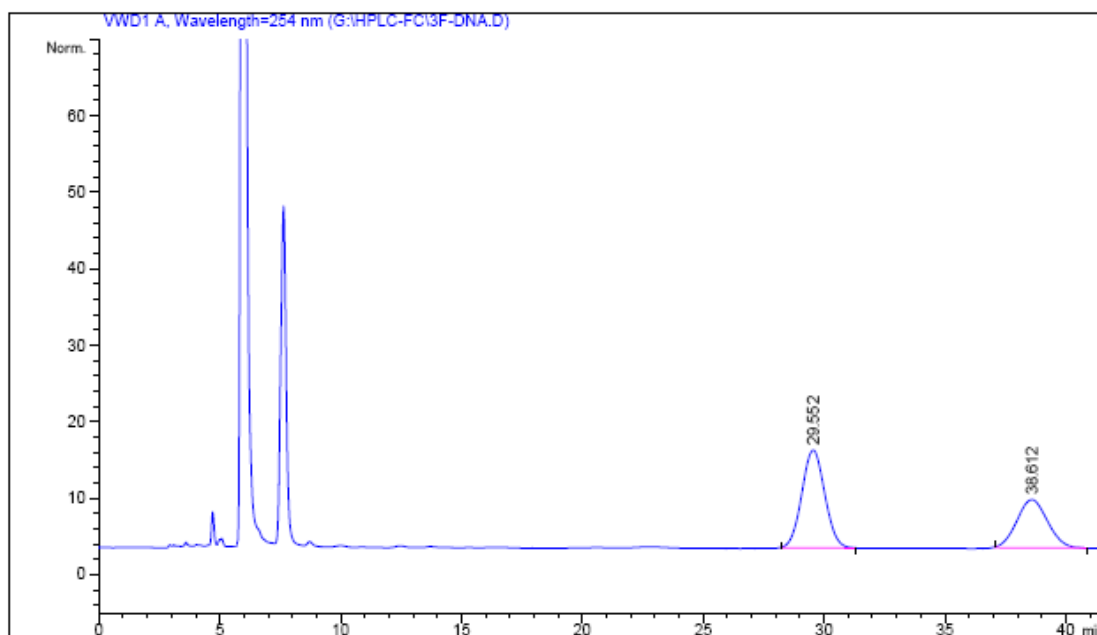

```
=====  
Area Percent Report  
=====
```

Sorted By : Signal  
Multiplier : 1.0000  
Dilution : 1.0000  
Use Multiplier & Dilution Factor with ISTDs

Signal 1: VWD1 A, Wavelength=254 nm

| Peak # | RetTime [min] | Type | Width [min] | Area mAU *s | Height [mAU] | Area %  |
|--------|---------------|------|-------------|-------------|--------------|---------|
| 1      | 29.552        | BB   | 1.0256      | 849.03088   | 12.80160     | 60.4565 |
| 2      | 38.612        | BB   | 1.2247      | 555.33667   | 6.29280      | 39.5435 |

Totals : 1404.36755 19.09440

```
=====  
*** End of Report ***
```

**3-(4-bromophenyl)-3-(5-methoxy-1*H*-indol-3-yl)-1-(1-methyl-1*H*-imidazol-2-yl)  
propan-1-one (3g).**

<sup>1</sup>H-NMR (CDCl<sub>3</sub>, 400 MHz) δ 3.76 (s, 3H), 3.81 (dd, *J* = 16.8, 8.0 Hz, 1H), 3.91 (s, 3H), 3.95 (dd, *J* = 16.8, 7.2 Hz, 1H), 4.95 (t, *J* = 7.6 Hz, 1H), 6.79 (dd, *J* = 8.8, 2.4 Hz, 1H), 6.86 (d, *J* = 2.4 Hz, 1H), 7.00 (s, 1H), 7.09 (d, *J* = 2.1 Hz, 1H), 7.15 (d, *J* = 0.8 Hz, 1H), 7.19 (d, *J* = 8.8 Hz, 1H), 7.25 (d, *J* = 9.5 Hz, 2H), 7.35 (d, *J* = 8.5 Hz, 2H), 8.11–8.01 (m, 1H).

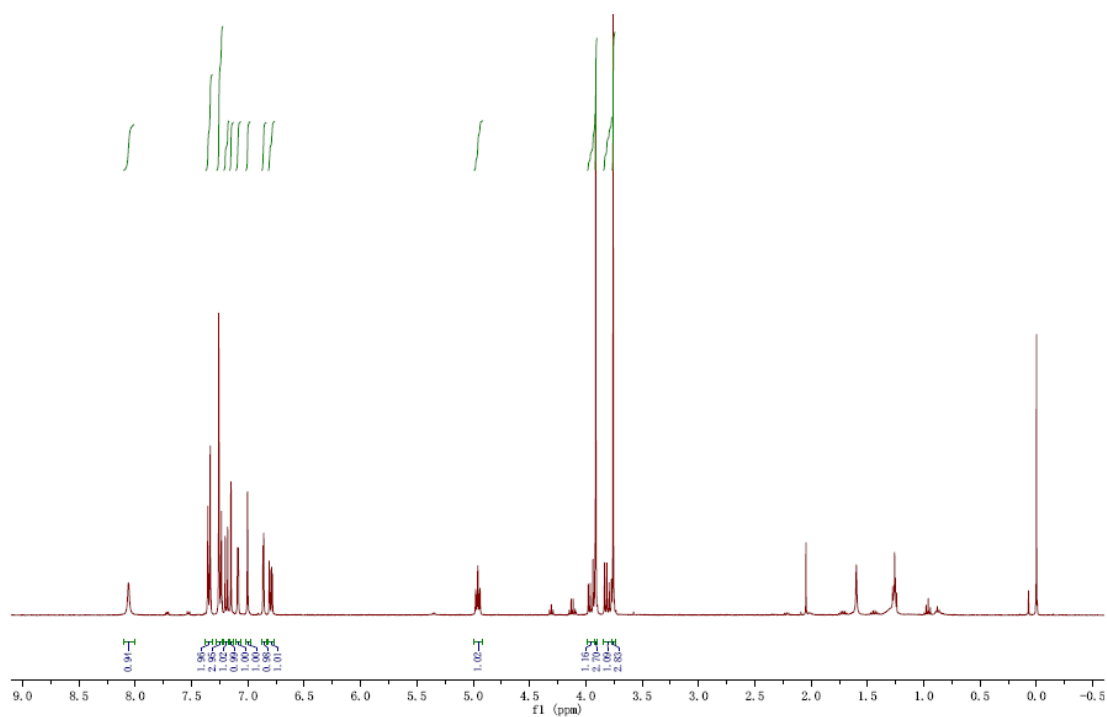

HPLC condition: Daicel chiralpak-AD, hexane/*i*-PrOH 80:20, 1.0 mL/min, 254 nm.

Racemic **3g**.

Retention times: 34.6 and 41.4 mins.

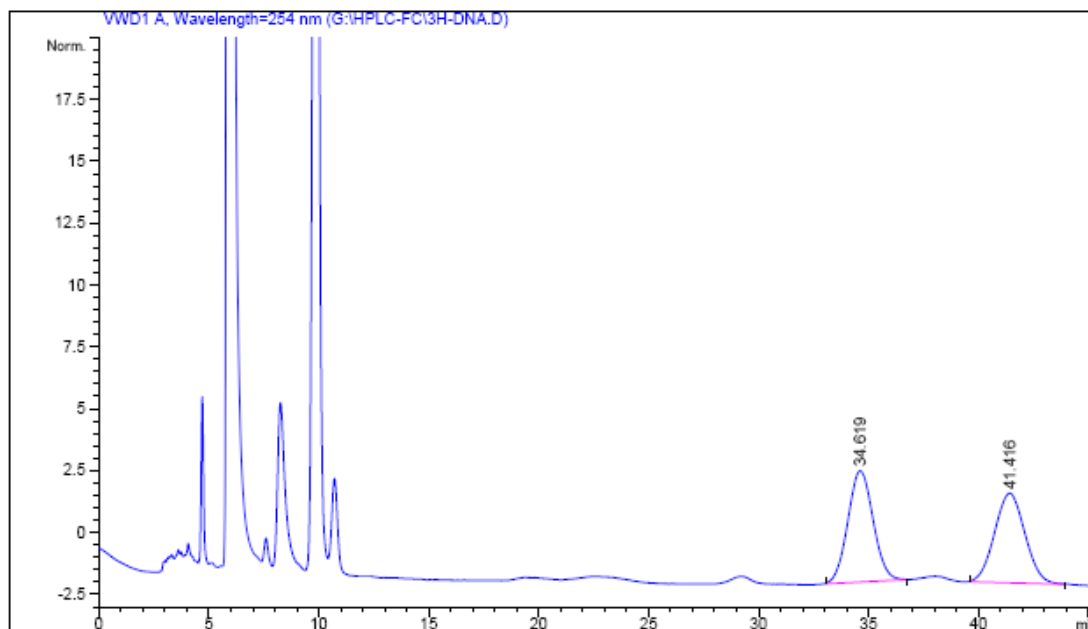

```
=====  
                          Area Percent Report  
=====
```

Sorted By : Signal  
Multiplier : 1.0000  
Dilution : 1.0000  
Use Multiplier & Dilution Factor with ISTDs

Signal 1: VWD1 A, Wavelength=254 nm

| Peak # | RetTime [min] | Type | Width [min] | Area mAU  | Area *s | Height [mAU] | Area %  |
|--------|---------------|------|-------------|-----------|---------|--------------|---------|
| 1      | 34.619        | BB   | 1.2173      | 359.85638 |         | 4.49097      | 50.9060 |
| 2      | 41.416        | BB   | 1.4119      | 347.04718 |         | 3.62212      | 49.0940 |

Totals : 706.90356 8.11310

```
=====  
*** End of Report ***
```

Product **3g** from the F-C reaction catalyzed by ODN-1-Cu<sup>2+</sup> containing 50 mM NaCl (7% ee).

Retention times: 33.4 and 40.5 mins.

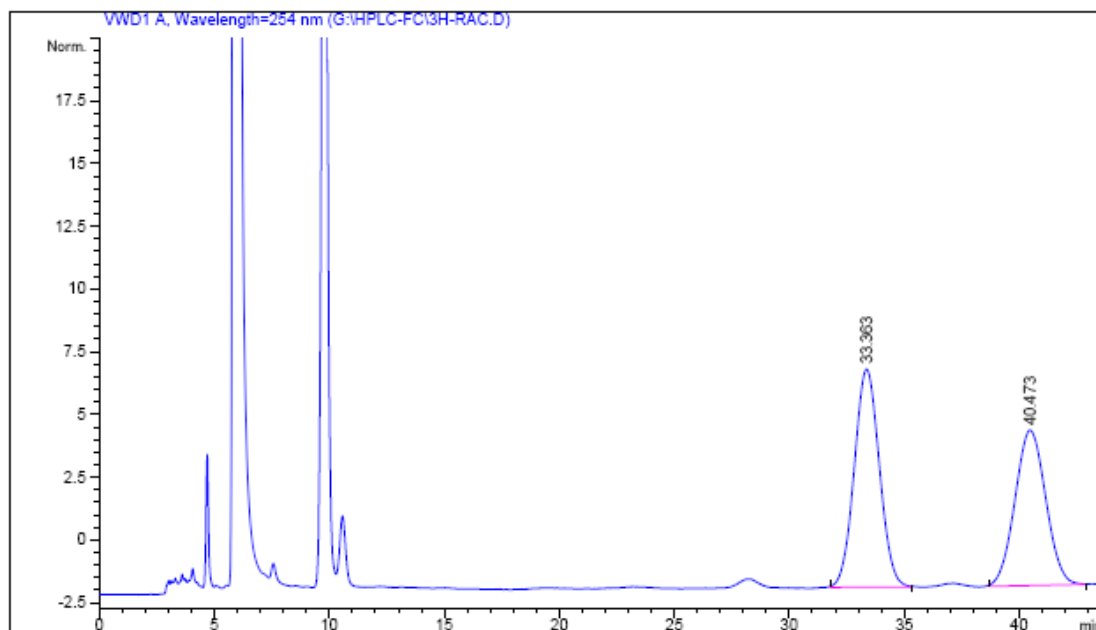

```
=====  
Area Percent Report  
=====
```

Sorted By : Signal  
Multiplier : 1.0000  
Dilution : 1.0000  
Use Multiplier & Dilution Factor with ISTDs

Signal 1: WVD1 A, Wavelength=254 nm

| Peak # | RetTime [min] | Type | Width [min] | Area mAU *s | Height [mAU] | Area %  |
|--------|---------------|------|-------------|-------------|--------------|---------|
| 1      | 33.363        | BB   | 1.1794      | 659.35144   | 8.68888      | 53.3143 |
| 2      | 40.473        | BB   | 1.4168      | 577.37415   | 6.19247      | 46.6857 |

Totals : 1236.72559 14.88135

```
=====  
*** End of Report ***
```

**3-(4-chlorophenyl)-3-(5-methoxy-1H-indol-3-yl)-1-(1-methyl-1H-imidazol-2-yl)propan-1-one (3h).**

$^1\text{H-NMR}$  ( $\text{CDCl}_3$ , 400 MHz)  $\delta$  3.72 (s, 3H), 3.80 (dd,  $J = 16.4, 8.0$  Hz, 1H), 3.92 (s, 3H), 3.96 (dd,  $J = 16.8, 7.6$  Hz, 1H), 4.98 (t,  $J = 7.6$  Hz, 1H), 6.80 (dd,  $J = 8.8, 2.4$  Hz, 1H), 6.86 (d,  $J = 2.4$  Hz, 1H), 7.00 (s, 1H), 7.11 (d,  $J = 2.1$  Hz, 1H), 7.15 (d,  $J = 0.8$  Hz, 1H), 7.21 (d,  $J = 8.4$  Hz, 3H), 7.25 (d,  $J = 8.8$  Hz, 2H), 7.96–7.89 (m, 1H).

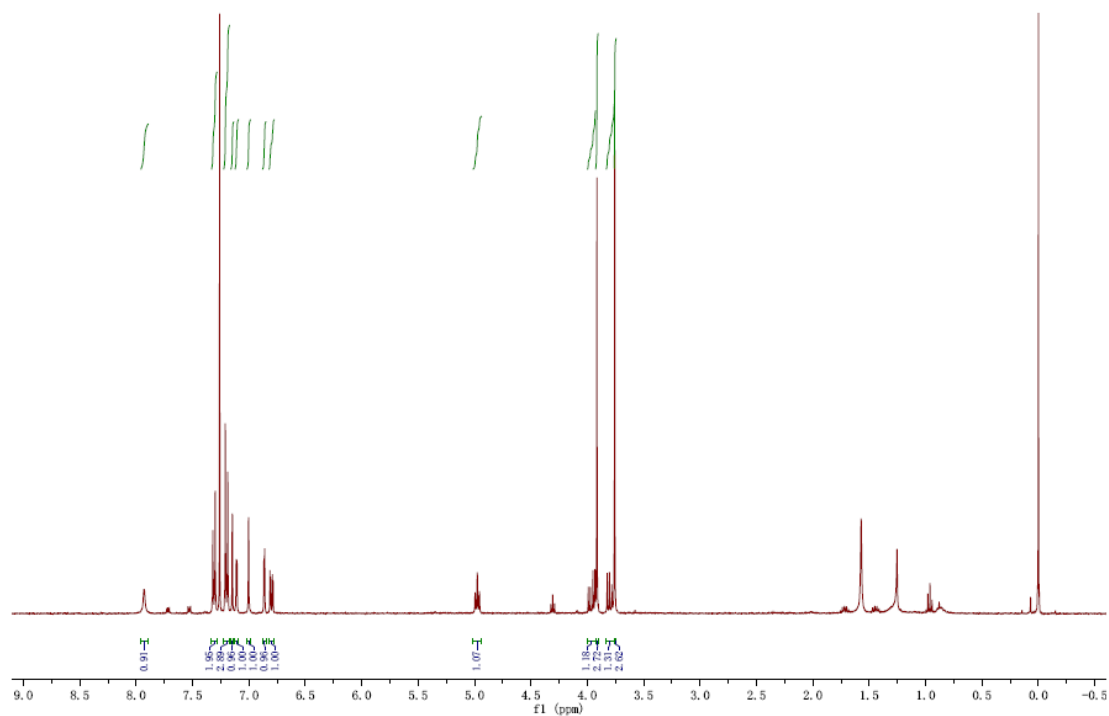



HPLC condition: Daicel chiralcel-OD, hexane/*i*-PrOH 80:20, 1.0 mL/min, 254 nm.

Racemic **3h**.

Retention times: 13.1 (+) and 15.3 (-) mins.

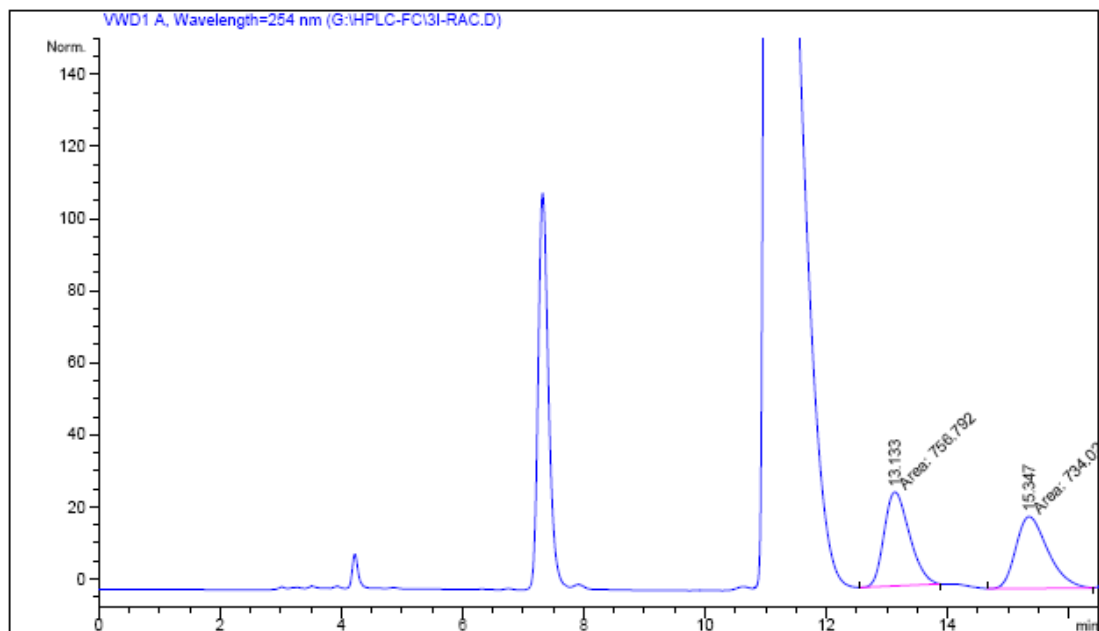

```
=====  
                          Area Percent Report  
=====
```

Sorted By : Signal  
Multiplier : 1.0000  
Dilution : 1.0000  
Use Multiplier & Dilution Factor with ISTDs

Signal 1: VWD1 A, Wavelength=254 nm

| Peak # | RetTime [min] | Type | Width [min] | Area mAU*s | Height [mAU] | Area %  |
|--------|---------------|------|-------------|------------|--------------|---------|
| 1      | 13.133        | MM   | 0.4839      | 756.79150  | 26.06750     | 50.7634 |
| 2      | 15.347        | MM   | 0.6137      | 734.02838  | 19.93410     | 49.2366 |

Totals : 1490.81989 46.00160

```
=====  
*** End of Report ***
```

Product **3h** from the F-C reaction catalyzed by ODN-**1**-Cu<sup>2+</sup> containing 50 mM NaCl (-7% ee).

Retention times: 13.1 (+) and 15.3 (-) mins.

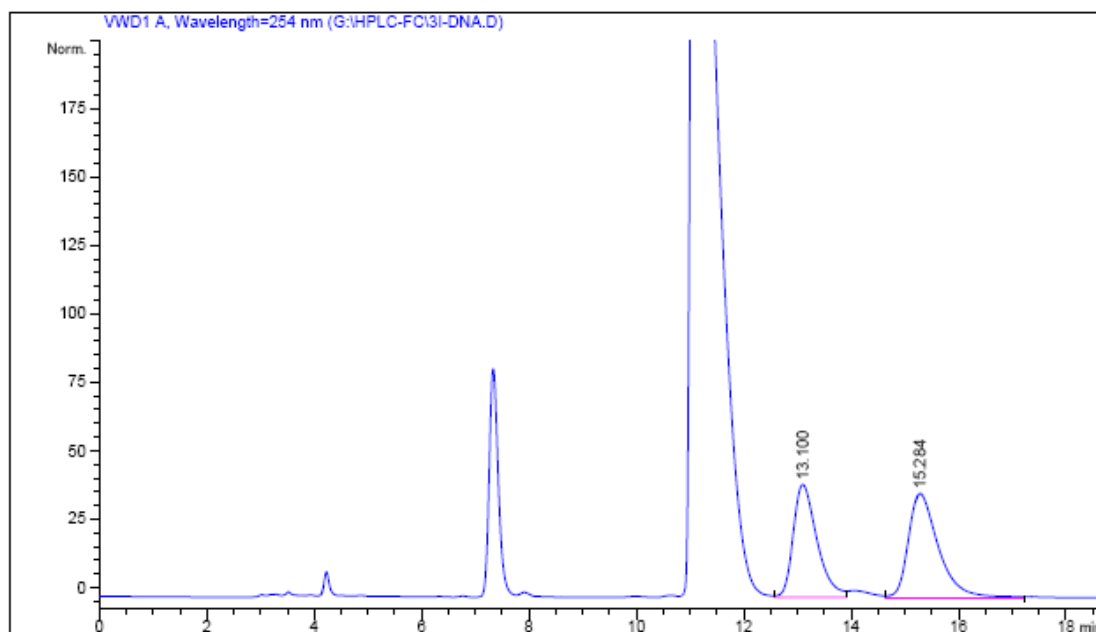

```
=====  
Area Percent Report  
=====
```

Sorted By : Signal  
Multiplier : 1.0000  
Dilution : 1.0000  
Use Multiplier & Dilution Factor with ISTDs

Signal 1: VWD1 A, Wavelength=254 nm

| Peak # | RetTime [min] | Type | Width [min] | Area mAU *s | Height [mAU] | Area %  |
|--------|---------------|------|-------------|-------------|--------------|---------|
| 1      | 13.100        | VV   | 0.4704      | 1270.52747  | 41.20019     | 46.4244 |
| 2      | 15.284        | VB   | 0.5846      | 1466.23621  | 37.96003     | 53.5756 |

Totals : 2736.76367 79.16022

```
=====  
*** End of Report ***
```

**3-(5-methoxy-1H-indol-3-yl)-3-(4-methoxyphenyl)-1-(1-methyl-1H-imidazol-2-yl)  
propan-1-one (3i).**

$^1\text{H-NMR}$  ( $\text{CDCl}_3$ , 400 MHz)  $\delta$  3.73 (s, 3H), 3.75 (s, 3H), 3.81 (dd,  $J = 16.3, 8.2$  Hz, 1H), 3.89 (s, 3H), 3.95 (dd,  $J = 16.3, 7.1$  Hz, 1H), 4.95 (t,  $J = 7.6$  Hz, 1H), 6.80–6.73 (m, 3H), 6.92 (d,  $J = 2.3$  Hz, 1H), 6.92 (d,  $J = 2.3$  Hz, 1H), 6.98 (s, 1H), 7.05 (d,  $J = 2.1$  Hz, 1H), 7.16 (d,  $J = 9.0$  Hz, 2H), 7.27 (d,  $J = 8.8$  Hz, 2H), 8.23 (s, 1H).

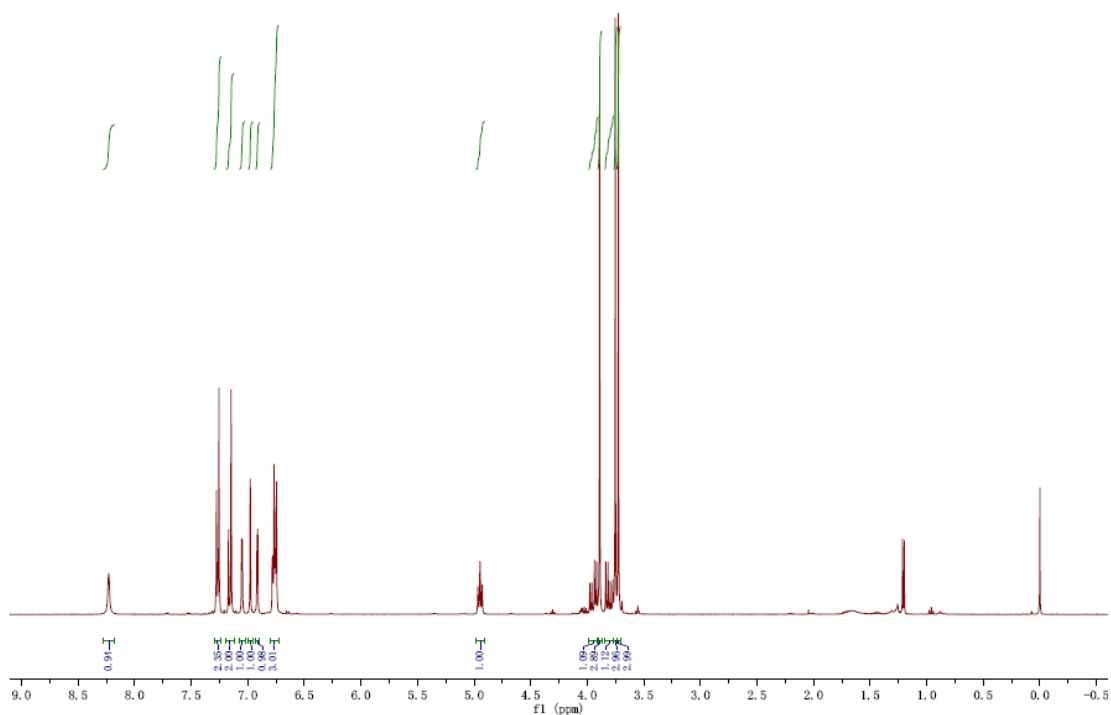

HPLC condition: Daicel chiralpak-AD, hexane/*i*-PrOH 80:20, 1.0 mL/min, 254 nm.

Racemic **3i**.

Retention times: 53.4 (-) and 59.6 (+) mins.

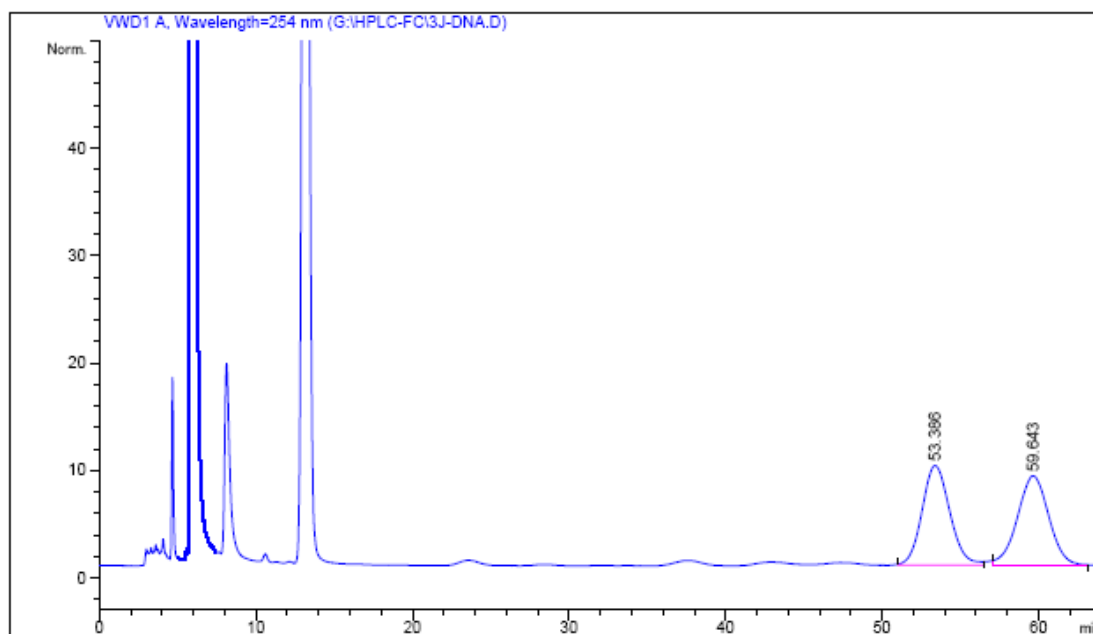

=====  
Area Percent Report  
=====

Sorted By : Signal  
Multiplier : 1.0000  
Dilution : 1.0000  
Use Multiplier & Dilution Factor with ISTDs

Signal 1: VWD1 A, Wavelength=254 nm

| Peak # | RetTime [min] | Type | Width [min] | Area mAU *s | Height [mAU] | Area %  |
|--------|---------------|------|-------------|-------------|--------------|---------|
| 1      | 53.386        | BB   | 1.8069      | 1137.32800  | 9.26191      | 49.7609 |
| 2      | 59.643        | BB   | 1.9740      | 1148.25562  | 8.30557      | 50.2391 |

Totals : 2285.58362 17.55748

=====  
\*\*\* End of Report \*\*\*

Product **3i** from the F-C reaction catalyzed by ODN-**1**-Cu<sup>2+</sup> containing 50 mM NaCl (-9% ee).

Retention times: 53.1 (-) and 59.5 (+) mins.

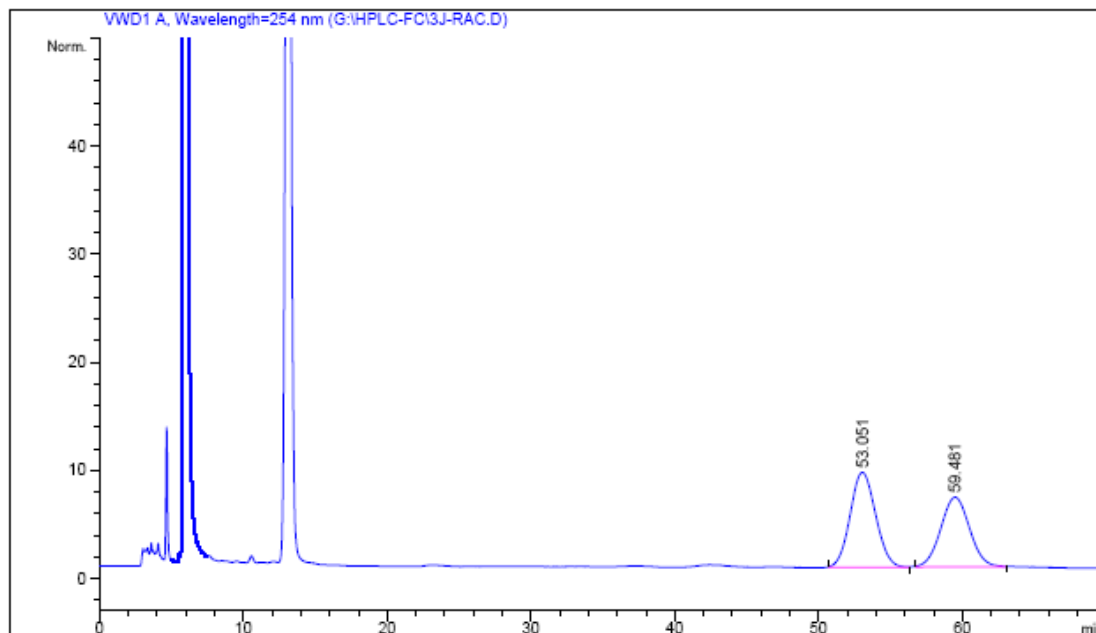

```
=====  
                          Area Percent Report  
=====
```

Sorted By : Signal  
Multiplier : 1.0000  
Dilution : 1.0000  
Use Multiplier & Dilution Factor with ISTDs

Signal 1: VWD1 A, Wavelength=254 nm

| Peak # | RetTime [min] | Type | Width [min] | Area mAU   | Area *s | Height [mAU] | Area %  |
|--------|---------------|------|-------------|------------|---------|--------------|---------|
| 1      | 53.051        | BB   | 1.8493      | 1081.61475 |         | 8.78877      | 54.6586 |
| 2      | 59.481        | BB   | 1.8921      | 897.24005  |         | 6.45644      | 45.3414 |

Totals : 1978.85480 15.24521

```
=====  
*** End of Report ***
```
